# Supplementary material for: A Computational Approach to Explore the Interaction of Semisynthetic Nitrogenous Heterocyclic Compounds with the SARS-CoV-2 Main Protease
Source: MDPI journal article supplement (doi:10.3390/biom11010018), 2020-12-27
Supplement: s1 [file s1]

**Table S3. Docking energy scores and lowest-energy poses for the compounds considered in this study.**

| Compound | Energy scores (kcal/mol) |       | Pose comparison<br>Blue = DOCK, Green = Smina                                       |                                                                                       |
|----------|--------------------------|-------|-------------------------------------------------------------------------------------|---------------------------------------------------------------------------------------|
|          | DOCK<br>GBSA             | Smina | Non-covalent interactions                                                           | Surface<br>Red wire = N3 orientation                                                  |
| PQ       | -25.8                    | -8.5  | 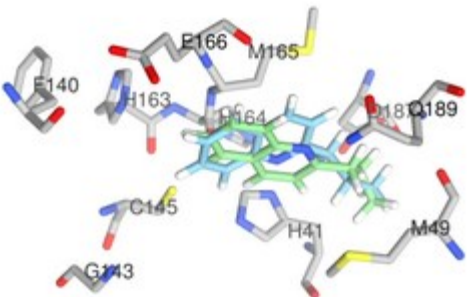   |    |
| 1        | -25.6                    | -8.3  |   |   |
| 2        | -25.3                    | -7.8  |  |  |

|   |       |       |                                                                                     |                                                                                       |
|---|-------|-------|-------------------------------------------------------------------------------------|---------------------------------------------------------------------------------------|
| 3 | -24.9 | -9.0  | 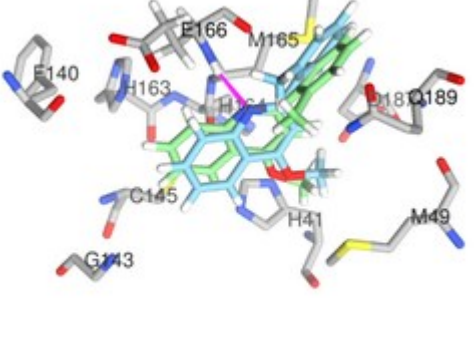   |    |
| 4 | -28.2 | -10.2 |    |    |
| 5 | -27.6 | -10.0 |  |  |
| 6 | -30.1 | -10.7 |  |  |

|    |       |      |                                                                                     |                                                                                       |
|----|-------|------|-------------------------------------------------------------------------------------|---------------------------------------------------------------------------------------|
| 7  | -25.5 | -9.0 | 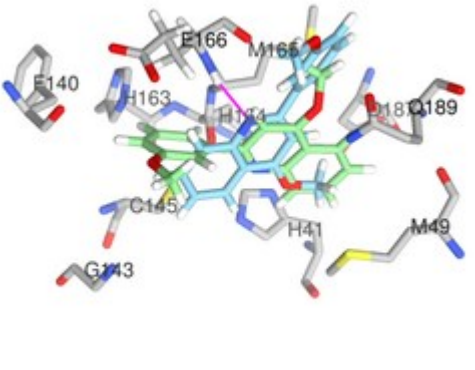   |    |
| 8  | -28.0 | -8.5 |    |    |
| 9  | -29.7 | -9.8 |  |  |
| 10 | -21.2 | -8.1 |  |  |

|    |       |      |                                                                                     |                                                                                       |
|----|-------|------|-------------------------------------------------------------------------------------|---------------------------------------------------------------------------------------|
| 11 | -24.2 | -8.5 | 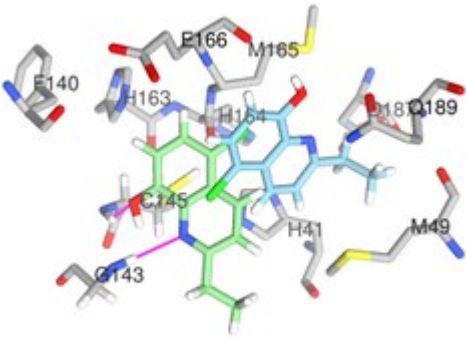   |    |
| 12 | -25.3 | -8.7 |    |    |
| 13 | -28.7 | -9.6 |  |   |
| 14 | -29.1 | -8.5 |  |  |

|    |       |       |                                                                                      |                                                                                       |
|----|-------|-------|--------------------------------------------------------------------------------------|---------------------------------------------------------------------------------------|
| 15 | -31.4 | -9.5  | 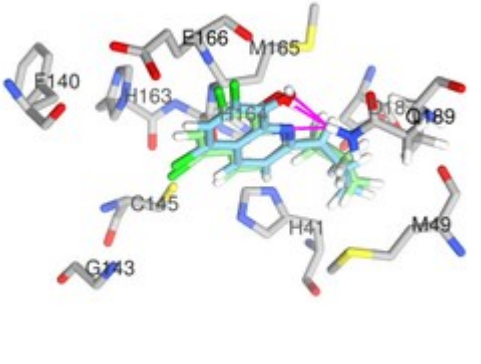   |    |
| 16 | -28.1 | -9.3  |    |    |
| 17 | -29.1 | -11.4 |  |  |
| 18 | -32.3 | -8.7  |  |  |

|      |       |       |                                                                                      |                                                                                       |
|------|-------|-------|--------------------------------------------------------------------------------------|---------------------------------------------------------------------------------------|
| 19   | -29.0 | -8.8  | 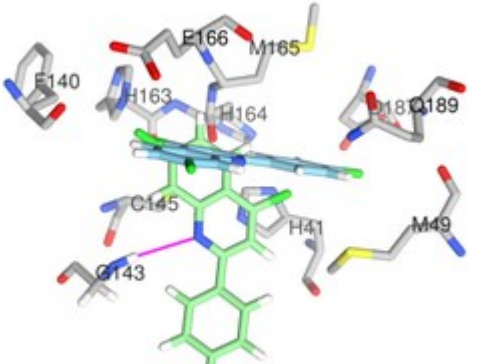   |    |
| 20   | -33.0 | -10.3 |    |    |
| 21   | -32.4 | -12.5 |  |  |
| 22_R | -38.5 | -10.0 |  |  |

|      |       |       |                                                                                      |                                                                                       |
|------|-------|-------|--------------------------------------------------------------------------------------|---------------------------------------------------------------------------------------|
| 22_S | -39.2 | -9.8  | 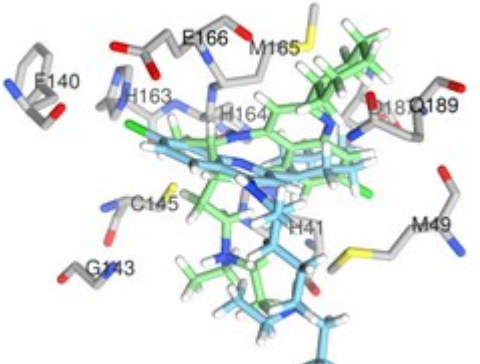   |    |
| 23   | -37.1 | -11.1 |    |    |
| 24   | -36.2 | -11.9 |  |  |
| 25   | -35.9 | -11.2 |  |  |

|    |       |       |                                                                                      |                                                                                       |
|----|-------|-------|--------------------------------------------------------------------------------------|---------------------------------------------------------------------------------------|
| 26 | -21.5 | -8.6  | 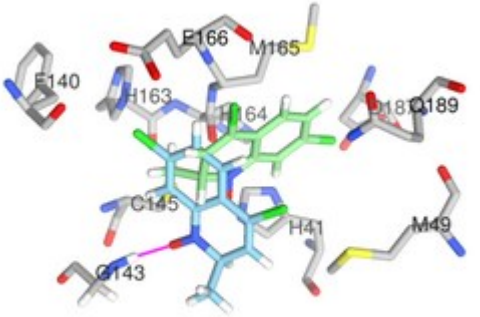   |    |
| 27 | -32.2 | -10.4 |    |    |
| 28 | -25.6 | -9.9  |  |  |
| 29 | -28.8 | -8.3  |  |  |

|    |       |       |                                                                                      |                                                                                       |
|----|-------|-------|--------------------------------------------------------------------------------------|---------------------------------------------------------------------------------------|
| 30 | -29.3 | -11.1 | 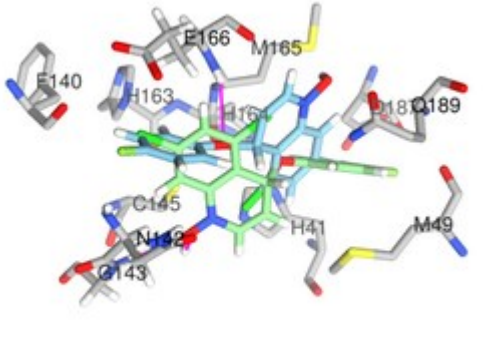   |    |
| 31 | -22.9 | -9.7  |    |    |
| 32 | -22.3 | -8.7  |  |  |
| 33 | -28.1 | -9.4  |  |  |

|    |       |       |                                                                                      |                                                                                       |
|----|-------|-------|--------------------------------------------------------------------------------------|---------------------------------------------------------------------------------------|
| 34 | -29.4 | -10.1 | 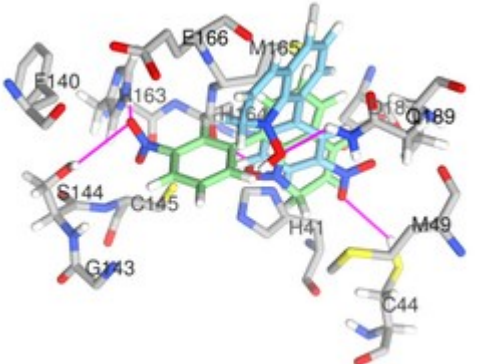   |    |
| 35 | -27.3 | -11.1 |    |    |
| 36 | -30.6 | -9.1  |  |  |
| 37 | -22.6 | -10.5 |  |  |

|    |       |       |                                                                                      |                                                                                       |
|----|-------|-------|--------------------------------------------------------------------------------------|---------------------------------------------------------------------------------------|
| 38 | -23.0 | -8.3  | 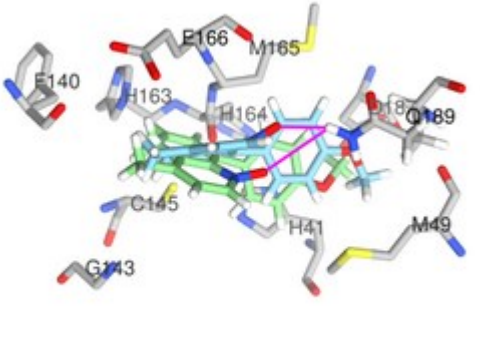   |    |
| 39 | -28.5 | -9.3  |    |    |
| 40 | -30.0 | -10.0 |  |  |
| 41 | -27.5 | -9.0  |  |  |

|    |       |       |                                                                                      |                                                                                       |
|----|-------|-------|--------------------------------------------------------------------------------------|---------------------------------------------------------------------------------------|
| 42 | -29.2 | -9.3  | 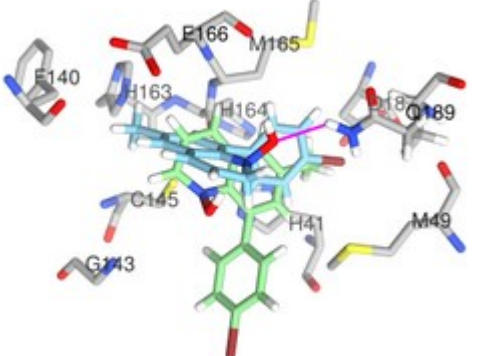   |    |
| 43 | -29.7 | -9.5  |    |    |
| 44 | -30.2 | -10.4 |  |  |
| 45 | -23.9 | -10.2 |  |  |

|    |       |       |                                                                                      |                                                                                       |
|----|-------|-------|--------------------------------------------------------------------------------------|---------------------------------------------------------------------------------------|
| 46 | -23.2 | -10.2 | 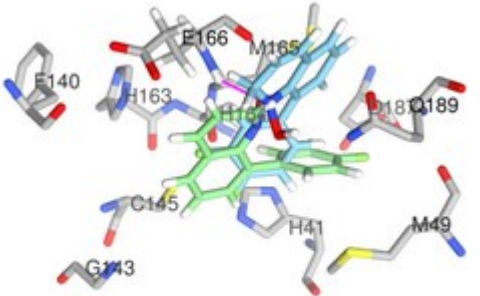   |    |
| 47 | -28.5 | -9.2  |    |    |
| 48 | -29.7 | -10.9 |  |  |
| 49 | -30.2 | -10.4 |  |  |

|    |       |       |                                                                                      |                                                                                       |
|----|-------|-------|--------------------------------------------------------------------------------------|---------------------------------------------------------------------------------------|
| 50 | -30.1 | -10.4 | 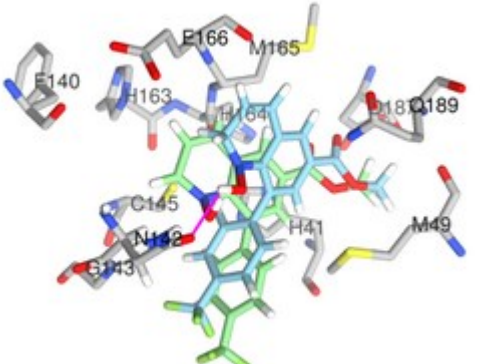   |    |
| 51 | -27.4 | -10.6 |    |    |
| 52 | -30.6 | -10.3 |  |  |
| PS | -26.5 | -10.1 |  |  |

|    |       |      |                                                                                      |                                                                                       |
|----|-------|------|--------------------------------------------------------------------------------------|---------------------------------------------------------------------------------------|
| 53 | -28.6 | -6.7 | 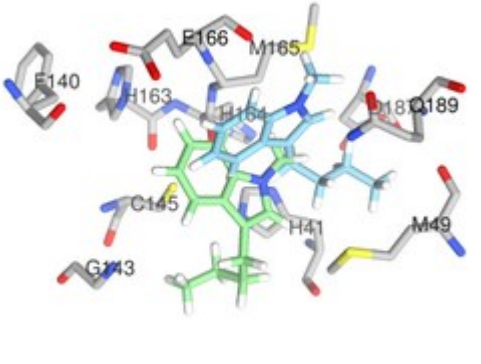   |    |
| 54 | -31.1 | -9.1 |    |    |
| 55 | -30.5 | -9.1 |  |  |
| 56 | -26.4 | -8.9 |  |  |

|    |       |      |                                                                                      |                                                                                       |
|----|-------|------|--------------------------------------------------------------------------------------|---------------------------------------------------------------------------------------|
| 57 | -28.3 | -8.4 | 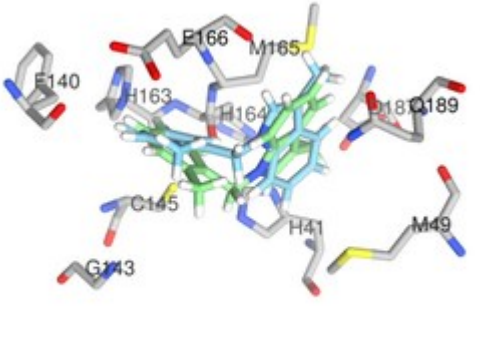   |    |
| 58 | -30.7 | -9.0 |    |    |
| 59 | -29.6 | -8.7 |  |  |
| 60 | -28.0 | -9.5 |  |  |

|    |       |      |                                                                                      |                                                                                       |
|----|-------|------|--------------------------------------------------------------------------------------|---------------------------------------------------------------------------------------|
| 61 | -28.6 | -9.8 | 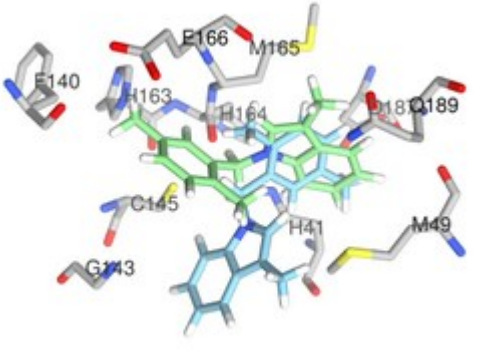   |    |
| 62 | -31.9 | -9.6 |    |    |
| 63 | -32.9 | -9.3 |  |  |
| 64 | -31.3 | -9.6 |  |  |

|    |       |       |                                                                                      |                                                                                       |
|----|-------|-------|--------------------------------------------------------------------------------------|---------------------------------------------------------------------------------------|
| 65 | -31.7 | -11.2 | 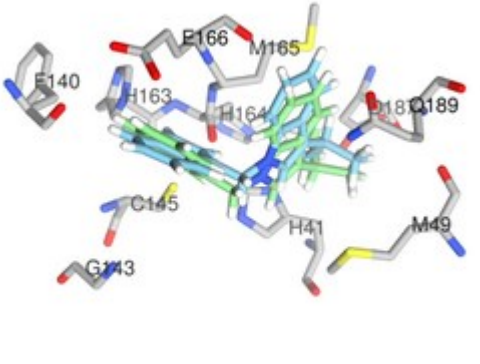   |    |
| 66 | -33.0 | -13.0 |    |    |
| 67 | -27.0 | -11.8 |  |  |
| 68 | -29.9 | -11.5 |  |  |

|    |       |      |                                                                                      |                                                                                       |
|----|-------|------|--------------------------------------------------------------------------------------|---------------------------------------------------------------------------------------|
| 69 | -26.4 | -8.4 | 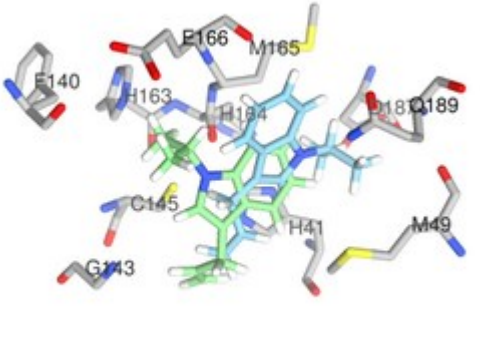   |    |
| 70 | -31.3 | -8.7 |    |    |
| 71 | -30.6 | -9.8 |  |  |
| 72 | -28.5 | -9.3 |  |  |

|    |       |       |                                                                                      |                                                                                       |
|----|-------|-------|--------------------------------------------------------------------------------------|---------------------------------------------------------------------------------------|
| 73 | -30.6 | -8.6  | 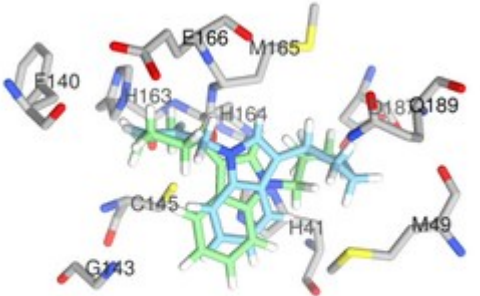   |    |
| 74 | -25.9 | -8.8  |    |    |
| 75 | -28.8 | -9.6  |  |  |
| 76 | -34.7 | -10.0 |  |  |

|    |       |       |                                                                                      |                                                                                       |
|----|-------|-------|--------------------------------------------------------------------------------------|---------------------------------------------------------------------------------------|
| 77 | -30.8 | -10.9 | 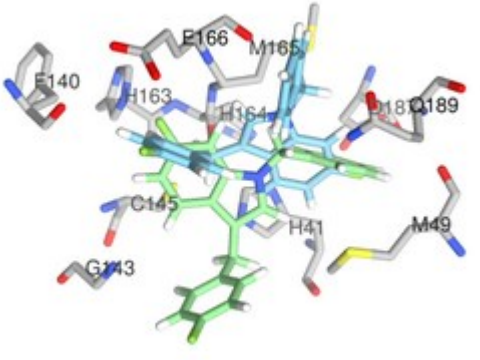   |    |
| 78 | -32.8 | -10.4 |    |    |
| 79 | -28.1 | -7.3  |  |  |
| 80 | -28.9 | -8.5  |  |  |

|    |       |       |                                                                                     |                                                                                       |
|----|-------|-------|-------------------------------------------------------------------------------------|---------------------------------------------------------------------------------------|
| 81 | -33.3 | -8.2  | 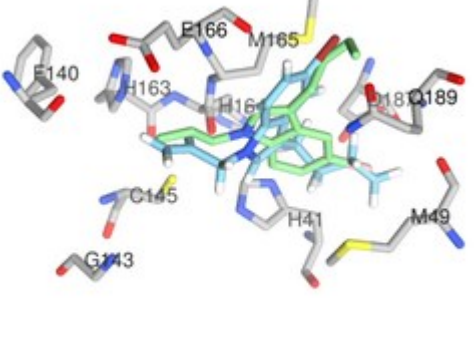   |    |
| 82 | -33.5 | -8.5  |    |    |
| 83 | -33.9 | -9.0  |  |  |
| 84 | -37.3 | -12.9 |  |  |

|    |       |       |                                                                                      |                                                                                       |
|----|-------|-------|--------------------------------------------------------------------------------------|---------------------------------------------------------------------------------------|
| 85 | -33.2 | -8.4  | 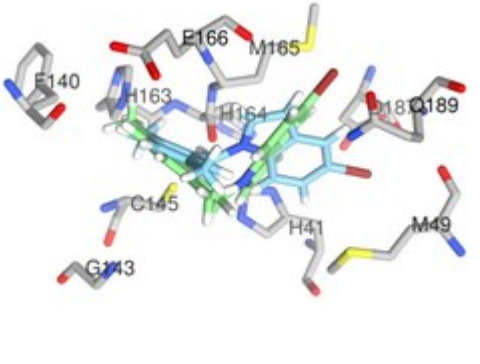   |    |
| 86 | -35.0 | -8.6  |    |    |
| 87 | -38.0 | -11.9 |  |  |
| 88 | -33.5 | -9.1  |  |  |

|       |       |      |                                                                                      |                                                                                       |
|-------|-------|------|--------------------------------------------------------------------------------------|---------------------------------------------------------------------------------------|
| 89    | -33.6 | -8.9 | 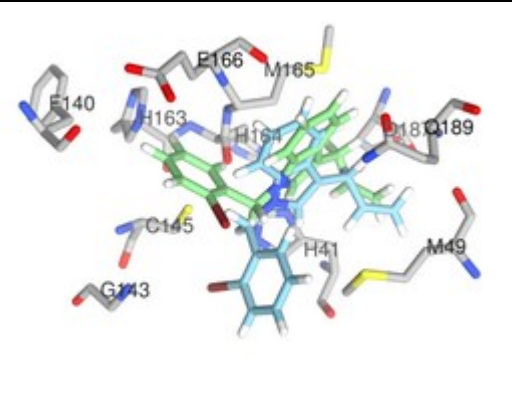   |    |
| 90    | -34.7 | -9.4 |    |    |
| 91_SR | -30.2 | -8.4 |   |   |
| 91_SS | -26.6 | -7.8 |  |  |

|       |       |      |                                                                                      |                                                                                       |
|-------|-------|------|--------------------------------------------------------------------------------------|---------------------------------------------------------------------------------------|
| 91_RR | -25.7 | -9.3 | 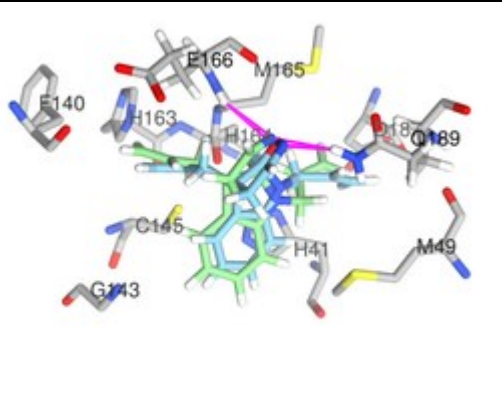   |    |
| 91_RS | -27.6 | -7.5 |    |    |
| 92_SR | -31.6 | -8.8 |   |   |
| 92_SS | -32.8 | -8.7 |  |  |

|       |       |       |                                                                                      |                                                                                       |
|-------|-------|-------|--------------------------------------------------------------------------------------|---------------------------------------------------------------------------------------|
| 92_RR | -31.2 | -8.6  | 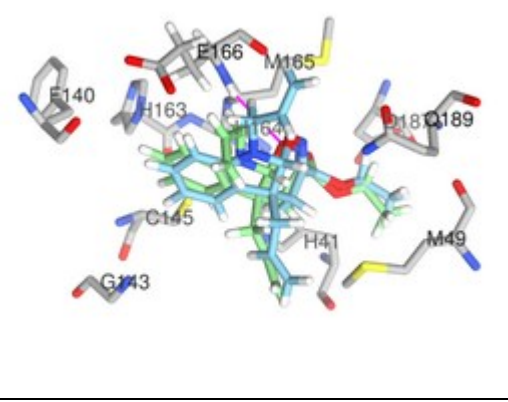   |    |
| 92_RS | -33.3 | -10.3 |    |    |
| 93_SR | -31.8 | -9.7  |   |   |
| 93_SS | -31.8 | -11.3 |  |  |

|       |       |       |                                                                                      |                                                                                       |
|-------|-------|-------|--------------------------------------------------------------------------------------|---------------------------------------------------------------------------------------|
| 93_RR | -32.8 | -9.5  | 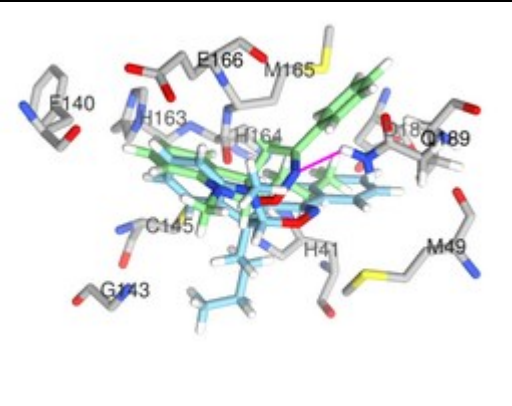   |    |
| 93_RS | -34.4 | -9.3  |    |    |
| 94_SR | -27.9 | -10.1 |   |   |
| 94_SS | -26.2 | -9.2  |  |  |

|       |       |       |                                                                                      |                                                                                       |
|-------|-------|-------|--------------------------------------------------------------------------------------|---------------------------------------------------------------------------------------|
| 94_RR | -28.6 | -9.3  | 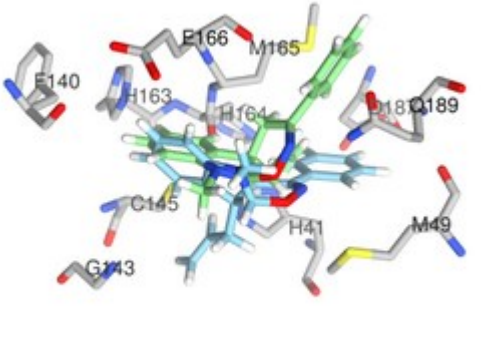   |    |
| 94_RS | -28.8 | -11.1 |    |    |
| 95_SR | -32.4 | -9.7  |  |  |
| 95_SS | -30.4 | -9.8  |  |  |

|       |       |       |                                                                                      |                                                                                       |
|-------|-------|-------|--------------------------------------------------------------------------------------|---------------------------------------------------------------------------------------|
| 95_RR | -30.6 | -9.1  | 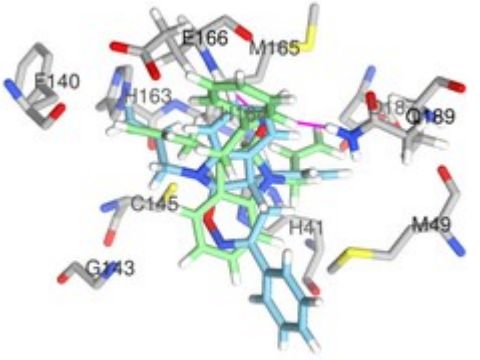   |    |
| 95_RS | -31.2 | -9.0  |    |    |
| 96_RR | -34.0 | -9.7  |  |  |
| 96_RS | -33.6 | -10.5 |  |  |

|       |       |       |                                                                                      |                                                                                       |
|-------|-------|-------|--------------------------------------------------------------------------------------|---------------------------------------------------------------------------------------|
| 96_SR | -30.2 | -10.4 | 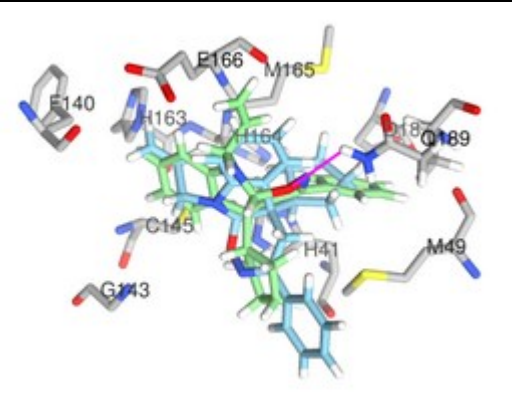   |    |
| 96_SS | -29.4 | -10.8 |    |    |
| 97_SR | -37.4 | -10.5 |   |   |
| 97_SS | -32.9 | -9.8  |  |  |

|       |       |       |                                                                                     |                                                                                       |
|-------|-------|-------|-------------------------------------------------------------------------------------|---------------------------------------------------------------------------------------|
| 97_RR | -34.0 | -10.0 | 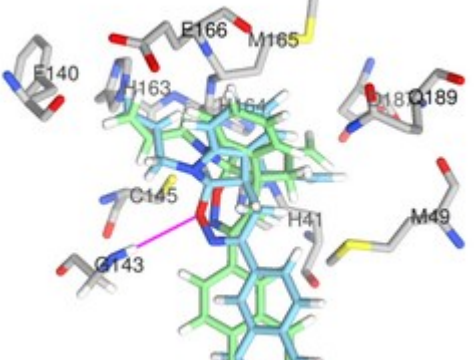   |    |
| 97_RS | -35.5 | -9.7  |    |    |
| 98_SR | -29.4 | -10.7 |  |  |
| 98_SS | -31.2 | -11.0 |  |  |

|       |       |       |                                                                                      |                                                                                       |
|-------|-------|-------|--------------------------------------------------------------------------------------|---------------------------------------------------------------------------------------|
| 98_RR | -29.4 | -12.8 | 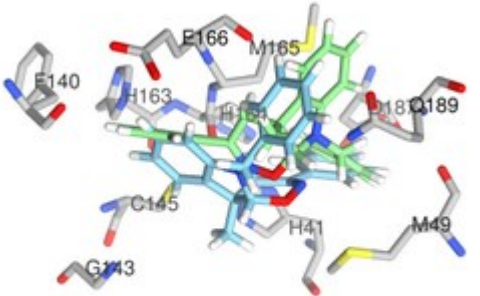   |    |
| 98_RS | -30.0 | -10.7 |    |    |
| 99_RR | -30.2 | -12.2 |  |  |
| 99_RS | -32.5 | -11.3 |  |  |

|        |       |       |                                                                                      |                                                                                       |
|--------|-------|-------|--------------------------------------------------------------------------------------|---------------------------------------------------------------------------------------|
| 99_SR  | -26.5 | -13.4 | 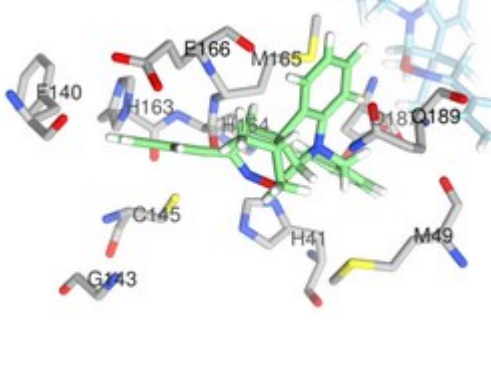   |    |
| 99_SS  | -29.6 | -11.4 |    |    |
| 100_SR | -30.2 | -11.6 |   |   |
| 100_SS | -31.5 | -9.8  |  |  |

|        |       |       |                                                                                      |                                                                                       |
|--------|-------|-------|--------------------------------------------------------------------------------------|---------------------------------------------------------------------------------------|
| 100_RR | -31.8 | -12.3 | 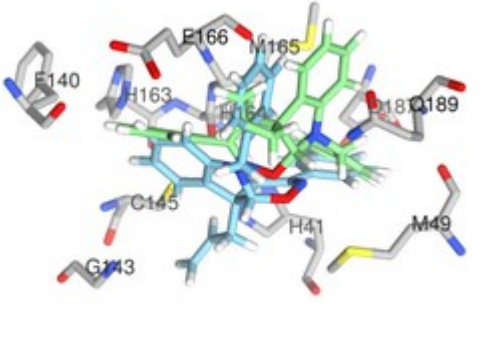   |    |
| 100_RS | -31.1 | -9.8  |    |    |
| 101_RR | -29.6 | -11.0 |  |  |
| 101_RS | -33.0 | -10.2 |  |  |

|        |       |       |                                                                                      |                                                                                       |
|--------|-------|-------|--------------------------------------------------------------------------------------|---------------------------------------------------------------------------------------|
| 101_SR | -33.2 | -11.1 | 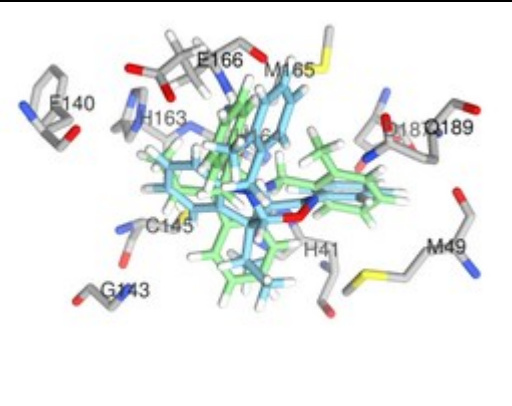   |    |
| 101_SS | -25.9 | -10.8 |    |    |
| 102_SR | -25.7 | -9.7  |   |   |
| 102_SS | -31.7 | -10.7 |  |  |

|        |       |       |                                                                                     |                                                                                       |
|--------|-------|-------|-------------------------------------------------------------------------------------|---------------------------------------------------------------------------------------|
| 102_RR | -28.6 | -12.5 | 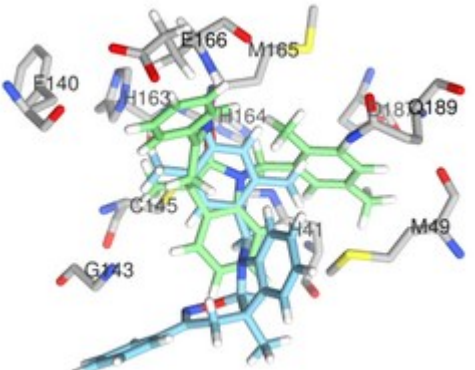   |    |
| 102_RS | -31.0 | -11.5 |    |    |
| 103_RR | -26.0 | -11.0 |  |  |
| 103_RS | -32.3 | -10.4 |  |  |

|               |       |       |                                                                                      |                                                                                       |
|---------------|-------|-------|--------------------------------------------------------------------------------------|---------------------------------------------------------------------------------------|
| <b>103_SR</b> | -34.0 | -11.1 | 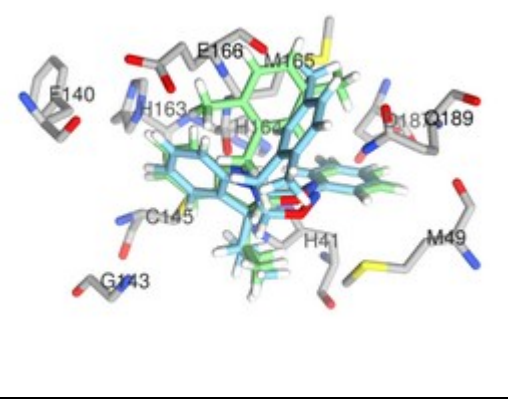   |    |
| <b>103_SS</b> | -32.6 | -11.7 |   |   |
| <b>104_RR</b> | -31.5 | -12.3 |  |  |
| <b>104_RS</b> | -35.9 | -12.1 |  |  |

|        |       |       |                                                                                      |                                                                                       |
|--------|-------|-------|--------------------------------------------------------------------------------------|---------------------------------------------------------------------------------------|
| 104_SR | -33.6 | -12.7 | 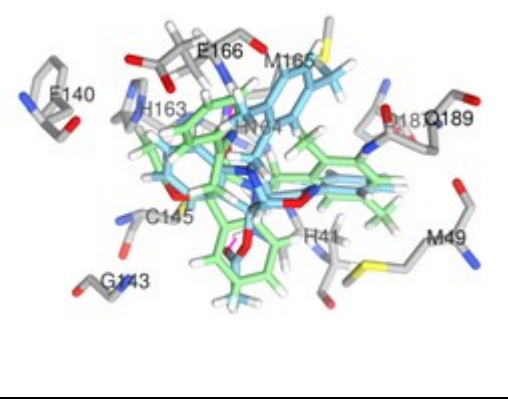   |    |
| 104_SS | -35.5 | -11.0 |   |   |
| 105_SR | -32.4 | -13.1 |  |  |
| 105_SS | -33.1 | -11.8 |  |  |

|        |       |       |                                                                                      |                                                                                       |
|--------|-------|-------|--------------------------------------------------------------------------------------|---------------------------------------------------------------------------------------|
| 105_RR | -30.2 | -12.8 | 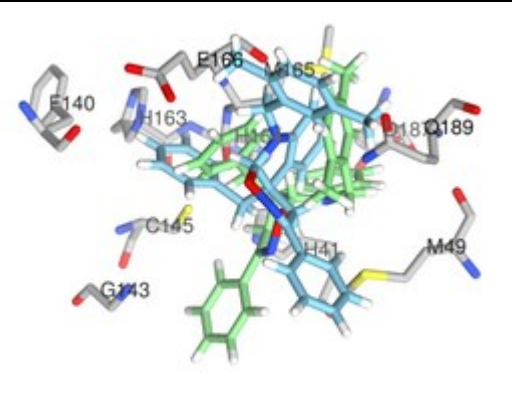   |    |
| 105_RS | -36.2 | -12.3 |    |    |
| 106_RR | -30.2 | -11.7 |   |   |
| 106_RS | -34.3 | -10.6 |  |  |

|        |       |       |                                                                                     |                                                                                       |
|--------|-------|-------|-------------------------------------------------------------------------------------|---------------------------------------------------------------------------------------|
| 106_SR | -33.4 | -11.3 | 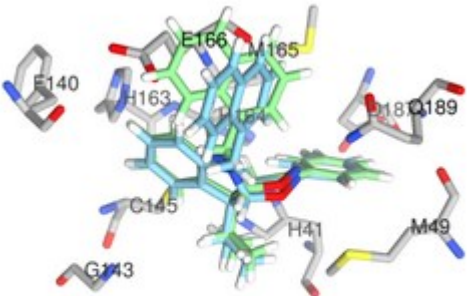   |    |
| 106_SS | -28.4 | -11.8 |    |    |
| 107_SR | -32.6 | -10.0 |  |   |
| 107_SS | -32.1 | -9.8  |  |  |

|        |       |       |                                                                                     |                                                                                       |
|--------|-------|-------|-------------------------------------------------------------------------------------|---------------------------------------------------------------------------------------|
| 107_RR | -30.2 | -10.2 | 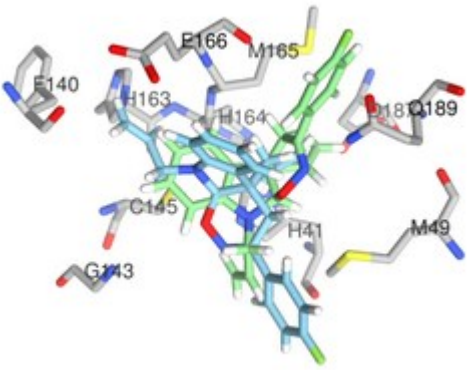   |    |
| 107_RS | -28.7 | -10.4 |    |    |
| 108_SR | -36.3 | -10.6 |  |  |
| 108_SS | -33.7 | -9.8  |  |  |

|        |       |      |                                                                                      |                                                                                       |
|--------|-------|------|--------------------------------------------------------------------------------------|---------------------------------------------------------------------------------------|
| 108_RR | -34.3 | -9.9 | 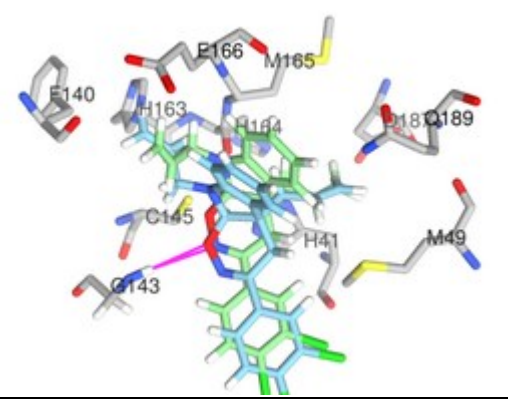   |    |
| 108_RS | -34.8 | -9.3 |   |   |
| 109_SR | -33.5 | -9.1 |  |  |
| 109_SS | -31.2 | -8.9 |  |  |

|        |       |       |                                                                                      |                                                                                       |
|--------|-------|-------|--------------------------------------------------------------------------------------|---------------------------------------------------------------------------------------|
| 109_RR | -30.6 | -9.1  | 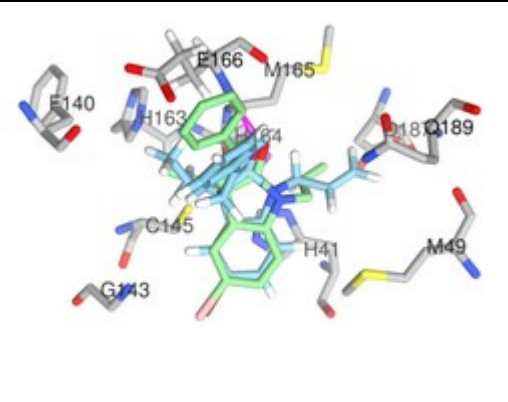   |    |
| 109_RS | -29.6 | -9.1  |    |    |
| 110_SR | -39.1 | -10.4 |   |   |
| 110_SS | -35.2 | -10.1 |  |  |

|        |       |       |                                                                                      |                                                                                       |
|--------|-------|-------|--------------------------------------------------------------------------------------|---------------------------------------------------------------------------------------|
| 110_RR | -33.3 | -9.6  | 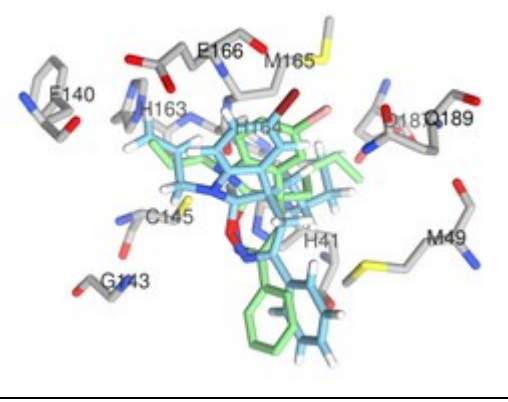   |    |
| 110_RS | -32.5 | -8.9  |   |   |
| 111_SR | -29.3 | -12.4 |  |  |
| 111_SS | -33.0 | -9.9  |  |  |

|        |       |       |                                                                                      |                                                                                       |
|--------|-------|-------|--------------------------------------------------------------------------------------|---------------------------------------------------------------------------------------|
| 111_RR | -27.1 | -10.7 | 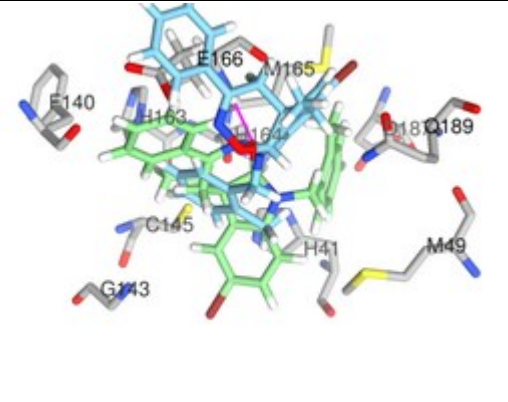   |    |
| 111_RS | -29.8 | -10.2 |    |    |
| 112_SR | -30.7 | -12.4 |  |  |
| 112_SS | -33.2 | -11.4 |  |  |

|        |       |       |                                                                                      |                                                                                       |
|--------|-------|-------|--------------------------------------------------------------------------------------|---------------------------------------------------------------------------------------|
| 112_RR | -29.4 | -12.1 | 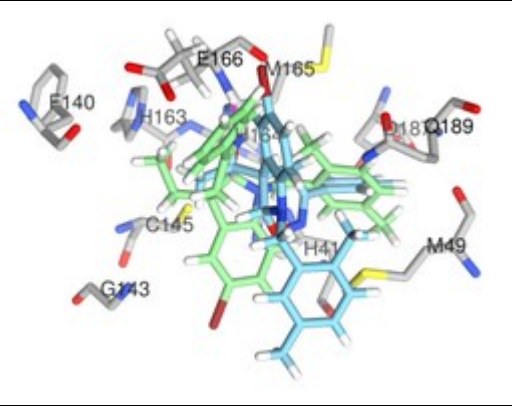   |    |
| 112_RS | -33.2 | -11.7 |   |   |
| 113_SR | -29.9 | -10.8 |  |  |
| 113_SS | -35.4 | -11.3 |  |  |

|        |       |       |                                                                                      |                                                                                       |
|--------|-------|-------|--------------------------------------------------------------------------------------|---------------------------------------------------------------------------------------|
| 113_RR | -31.8 | -10.7 | 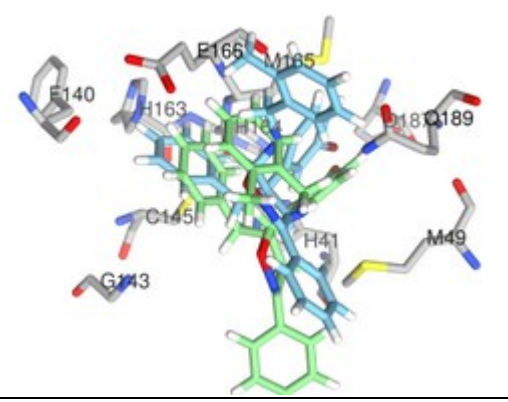   |    |
| 113_RS | -31.6 | -12.5 |   |   |
| 114_RR | -31.2 | -10.4 |  |  |
| 114_RS | -32.3 | -9.9  |  |  |

|        |       |       |                                                                                      |                                                                                       |
|--------|-------|-------|--------------------------------------------------------------------------------------|---------------------------------------------------------------------------------------|
| 114_SR | -33.4 | -10.5 | 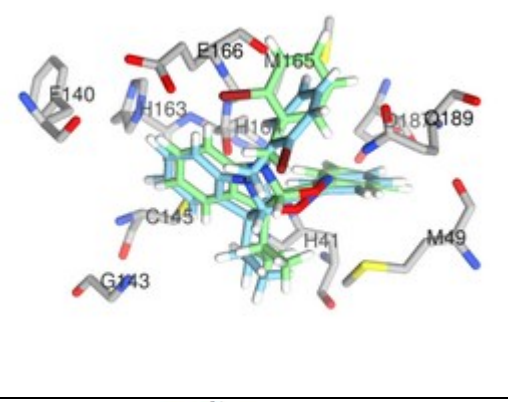   |    |
| 114_SS | -27.0 | -11.7 |   |   |
| 115_SR | -29.5 | -10.2 |  |  |
| 115_SS | -36.0 | -10.0 |  |  |

|        |       |       |                                                                                     |                                                                                       |
|--------|-------|-------|-------------------------------------------------------------------------------------|---------------------------------------------------------------------------------------|
| 115_RR | -33.5 | -10.5 | 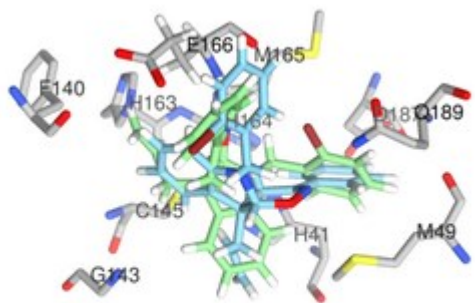   |    |
| 115_RS | -32.2 | -11.1 |    |   |
| 116_RR | -34.9 | -9.8  |  |  |
| 116_RS | -31.2 | -10.8 |  |  |

|        |       |       |                                                                                      |                                                                                       |
|--------|-------|-------|--------------------------------------------------------------------------------------|---------------------------------------------------------------------------------------|
| 116_SR | -36.5 | -9.9  | 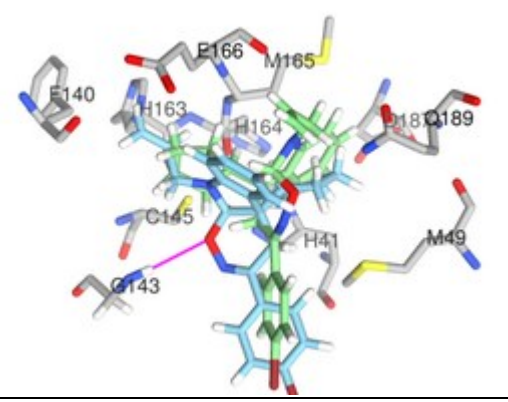   |    |
| 116_SS | -30.2 | -9.9  |   |   |
| 117_SR | -28.0 | -12.3 |  |  |
| 117_SS | -33.5 | -10.3 |  |  |

|        |       |       |                                                                                    |                                                                                     |
|--------|-------|-------|------------------------------------------------------------------------------------|-------------------------------------------------------------------------------------|
| 117_RR | -26.0 | -11.6 | 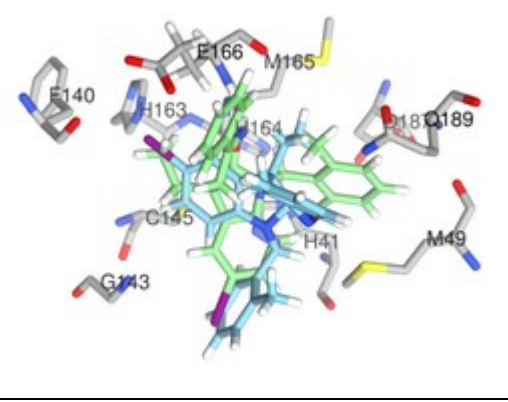 |  |
| 117_RS | -29.9 | -11.6 |  |  |
