# Supplementary material for: A Computational Approach to Explore the Interaction of Semisynthetic Nitrogenous Heterocyclic Compounds with the SARS-CoV-2 Main Protease
Source: MDPI journal article supplement (doi:10.3390/biom11010018), 2020-12-27
Supplement: s1 [file s1]

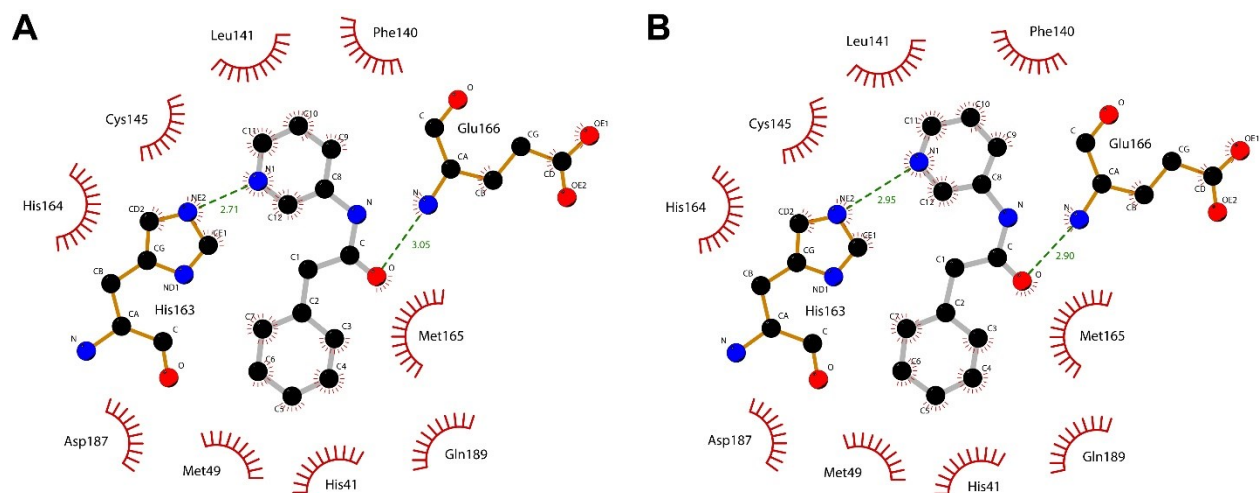

**Figure S1.** Non-covalent interactions among the GWS ligand and amino acid residues from the active site of SARS-CoV-2 M<sup>pro</sup>. **(A)** Interactions of the co-crystallized ligand. **(B)** Interactions after redocking with Smina and the flexible docking approach **(B)**. Hydrogen bonds are represented by dashed green lines together with the estimated length in Angstroms (Å). Other non-covalent interactions are represented with red arches.
